# Supplementary material
Source: MDPI journal article supplement (https://www.mdpi.com/2072-4292/11/16/1928)
Supplement: s1 [file s1]

# Supplementary Materials: Evaluation of the Uncertainty in Satellite-based Crop State Variable Retrievals Due to Site and Growth Stage Specific Factors and Their Potential in Coupling with Crop Growth Models *Remote Sensing* 2019, 8, remote sensing-567576.

Nathaniel Levitan <sup>1,\*</sup>, Yanghui Kang <sup>2,3</sup>, Mutlu Özdoğan <sup>3,4</sup>, Vincenzo Magliulo <sup>5</sup>, Paulo Castillo <sup>6</sup>, Fred Moshary<sup>1</sup> and Barry Gross <sup>1</sup>

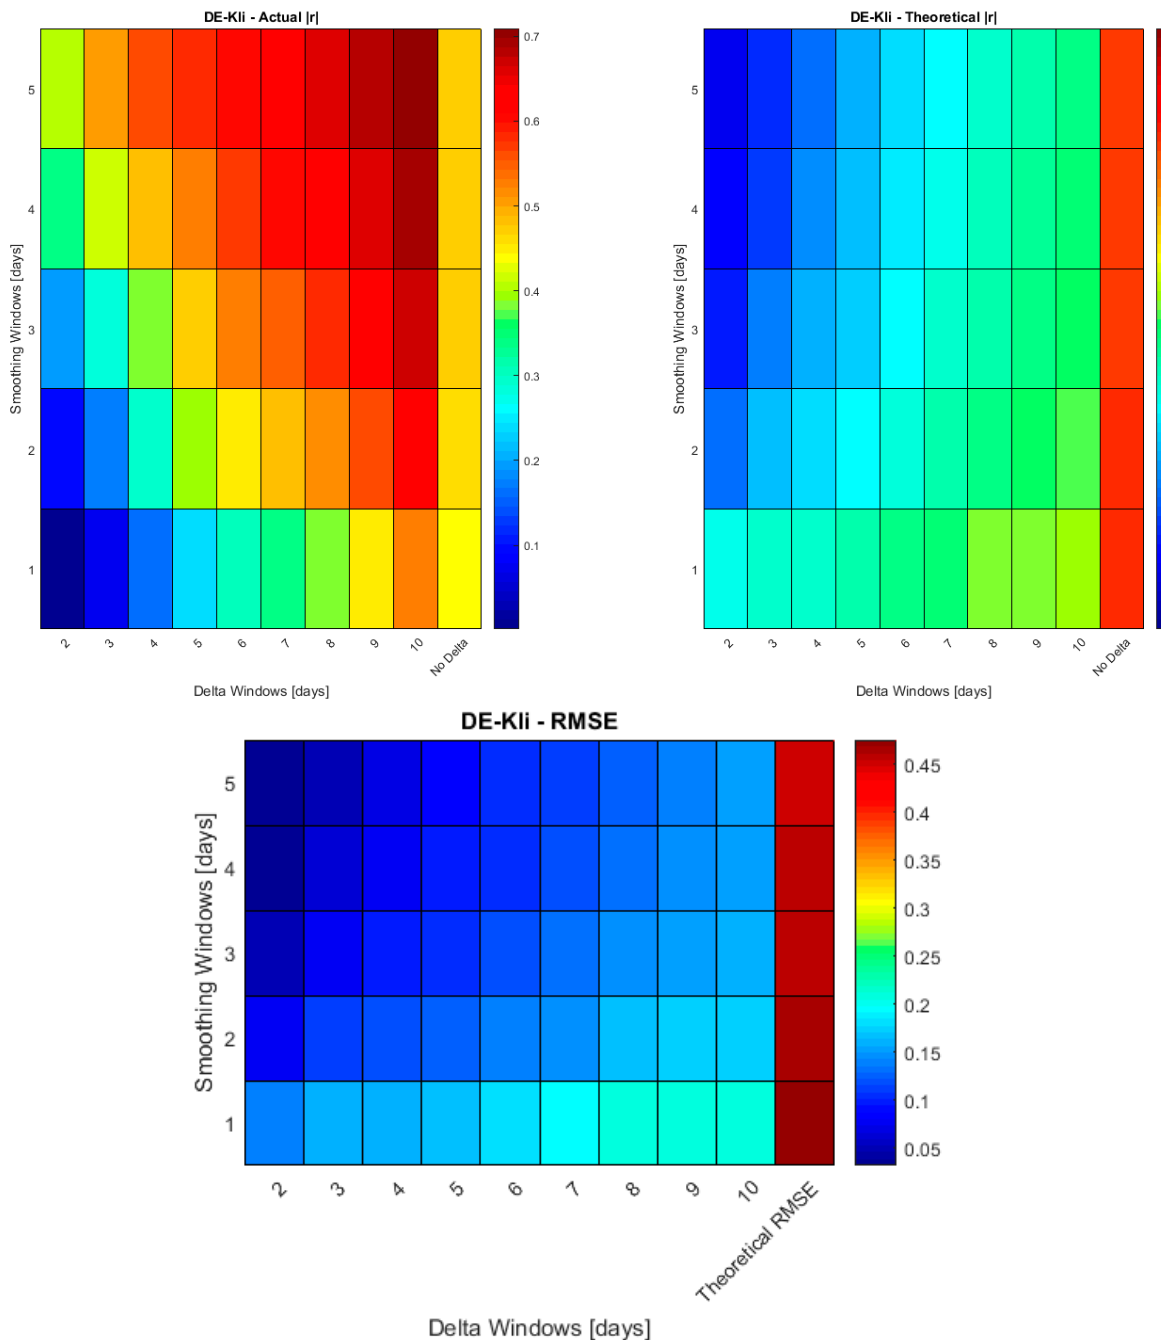

**Figure S1.** Actual versus theoretical  $|r|$  and RMSE performance of the  $\Delta LUE_{Canopy}$  retrievals at DE-Kli at different levels of smoothing and values of  $\Delta$ .  $N = 256$ .

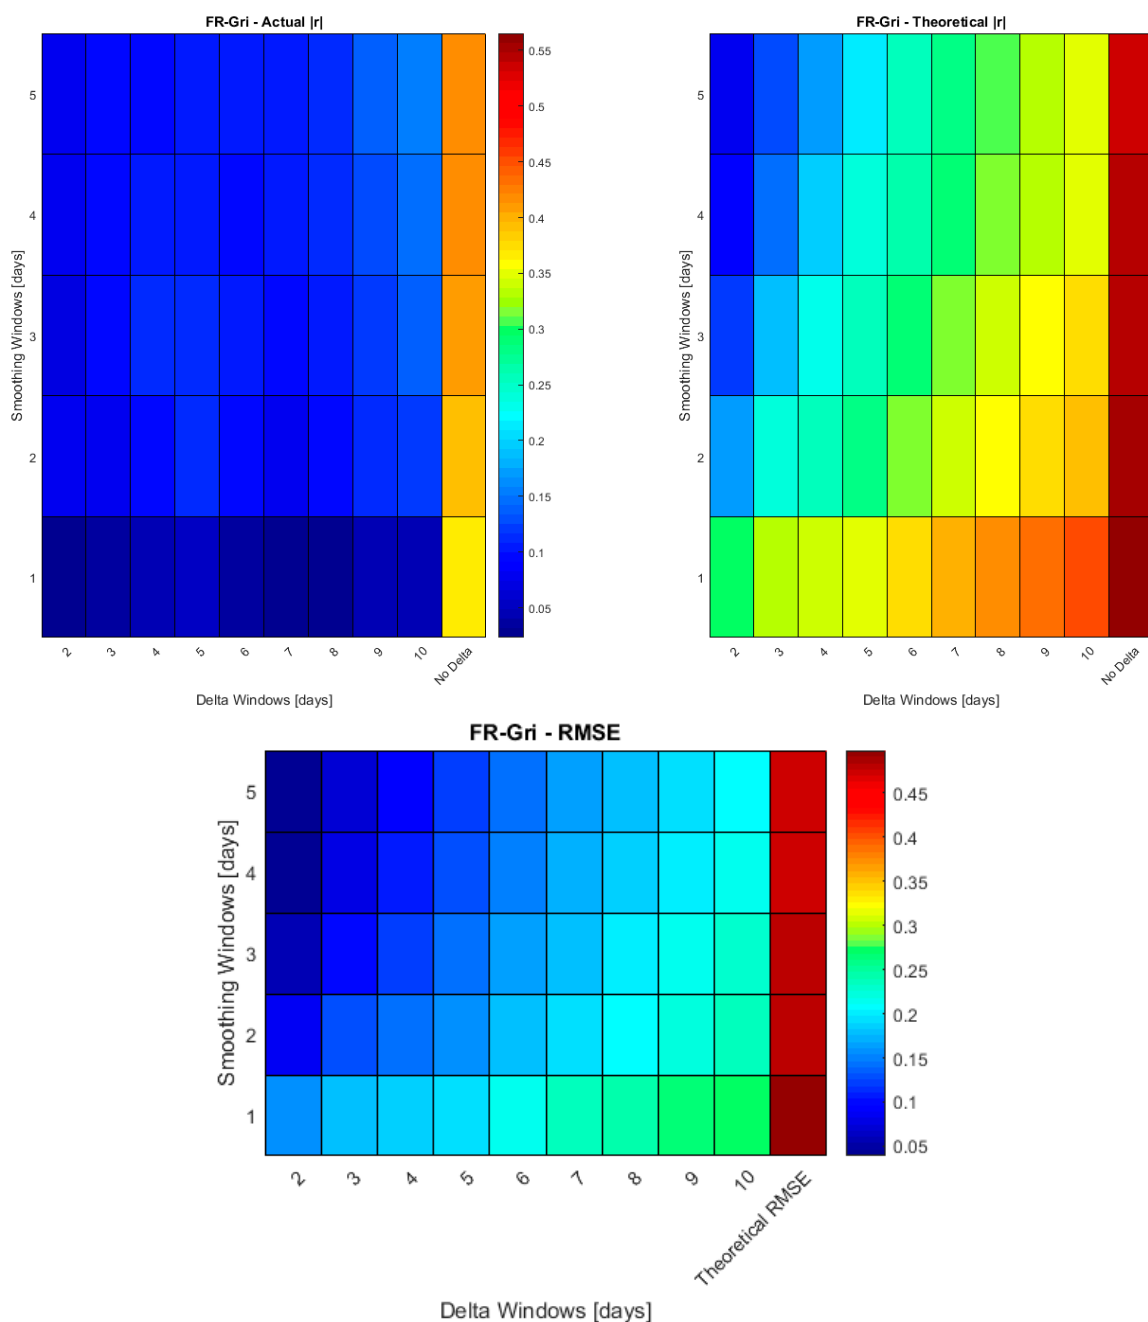

**Figure S2.** Actual versus theoretical  $|r|$  and RMSE performance of the  $\Delta LUE_{Canopy}$  retrievals at FR-Gri at different levels of smoothing and values of  $\Delta$ .  $N = 258$ .

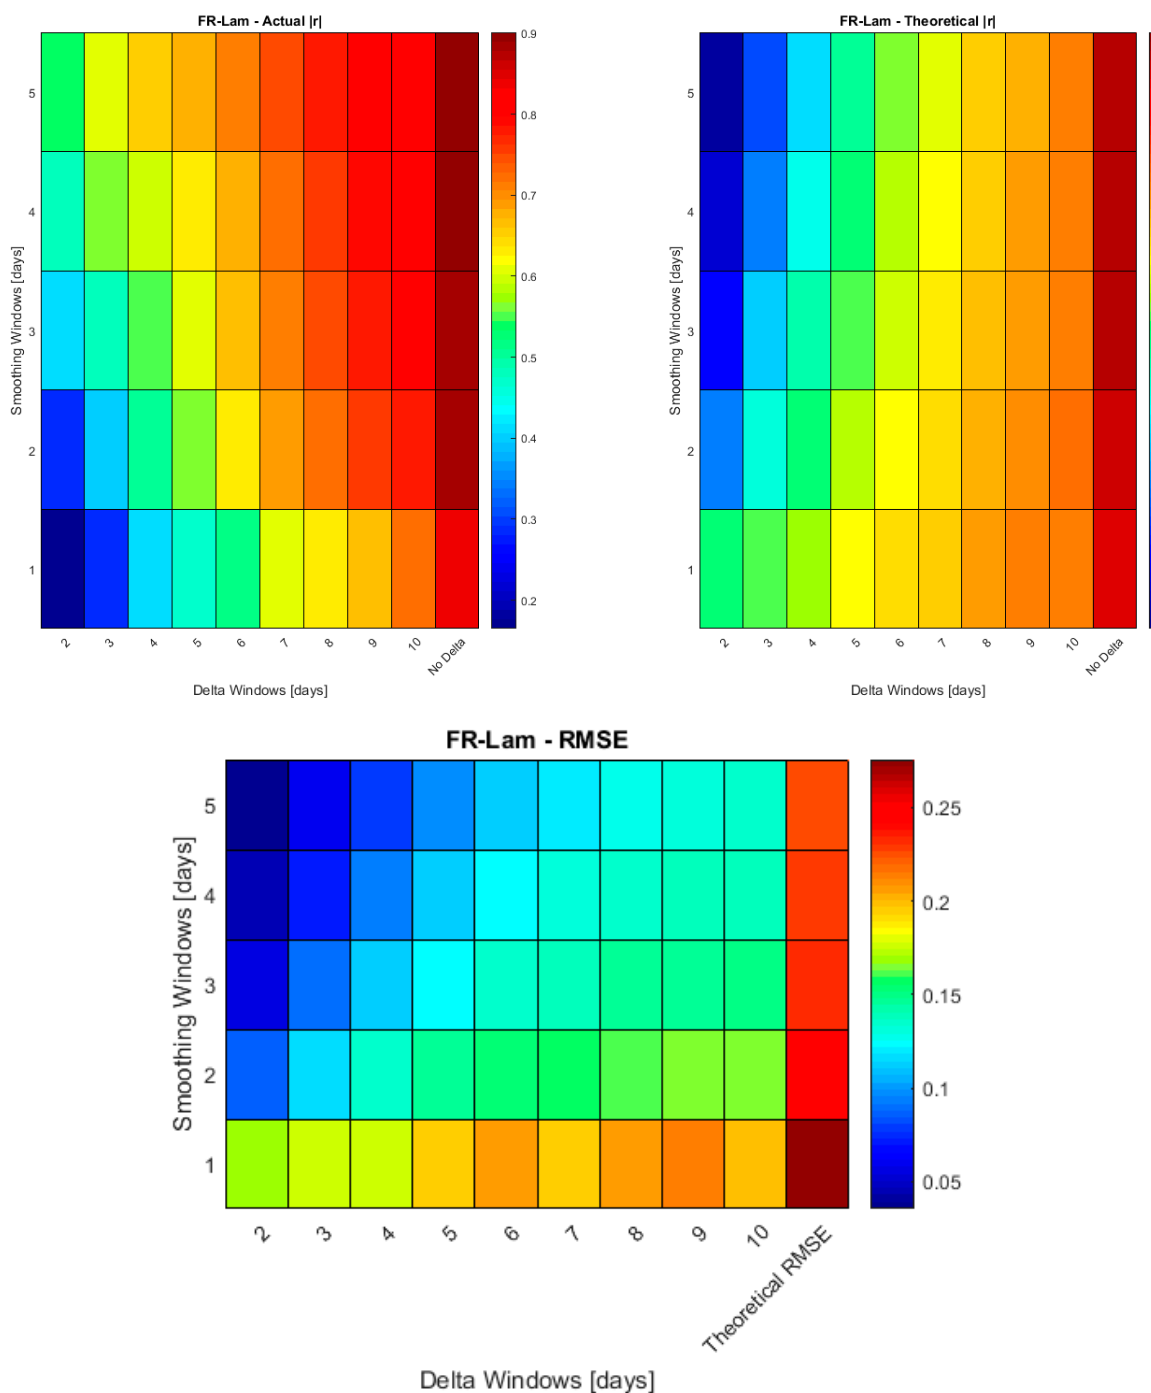

**Figure S3.** Actual versus theoretical  $|r|$  and RMSE performance of the  $\Delta LUE_{Canopy}$  retrievals at FR-Lam at different levels of smoothing and values of  $\Delta$ .  $N = 461$ .

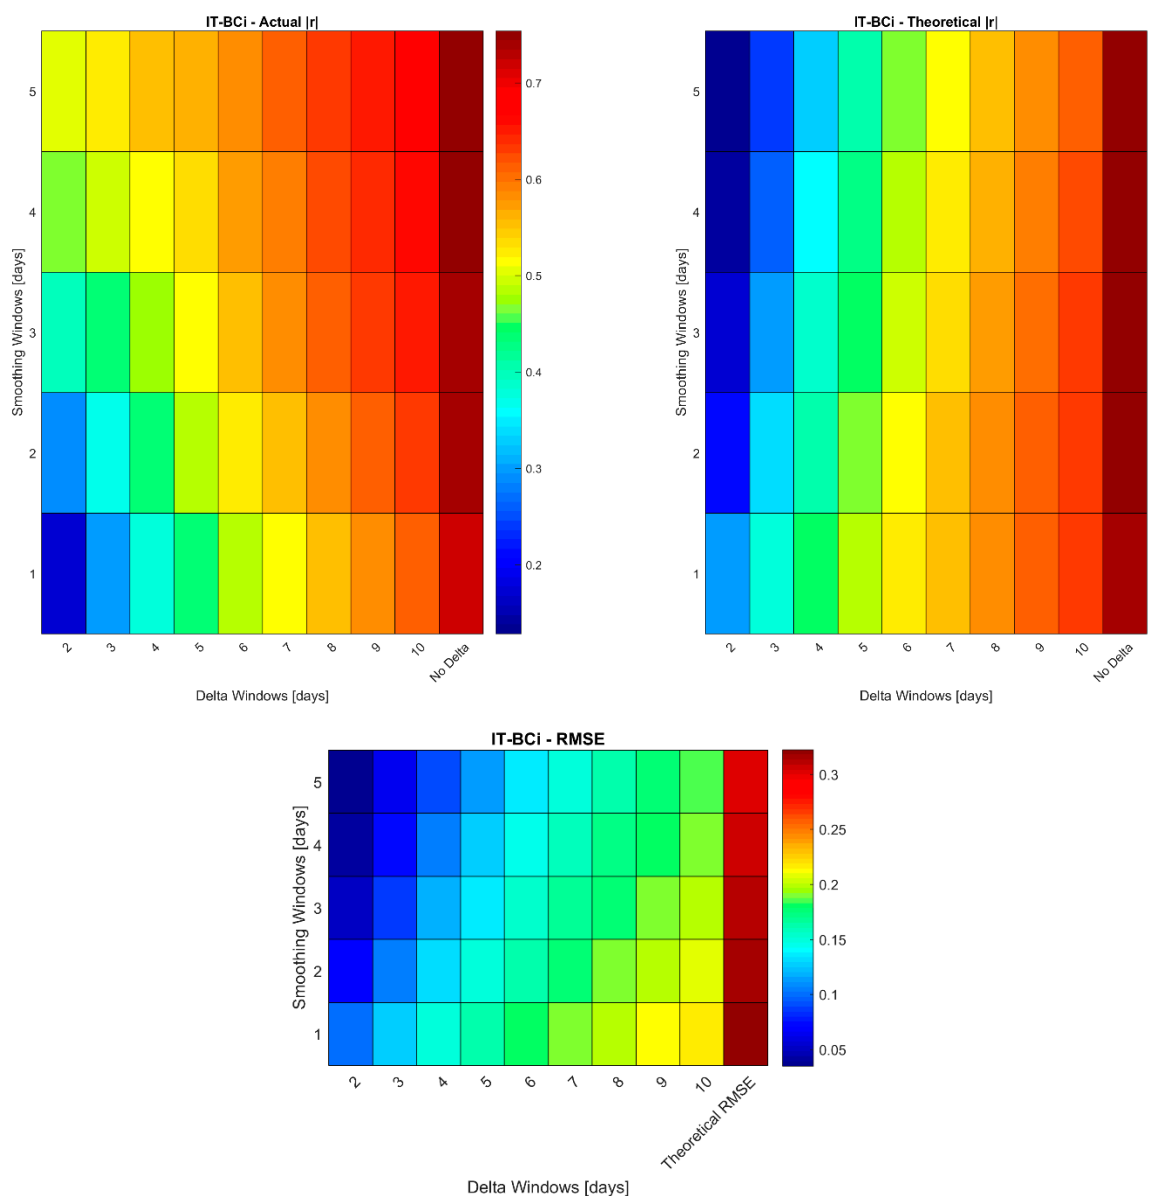

**Figure S4.** Actual versus theoretical  $|r|$  and RMSE performance of the  $\Delta LUE_{Canopy}$  retrievals at IT-Bi at different levels of smoothing and values of  $\Delta$ .  $N = 536$ .

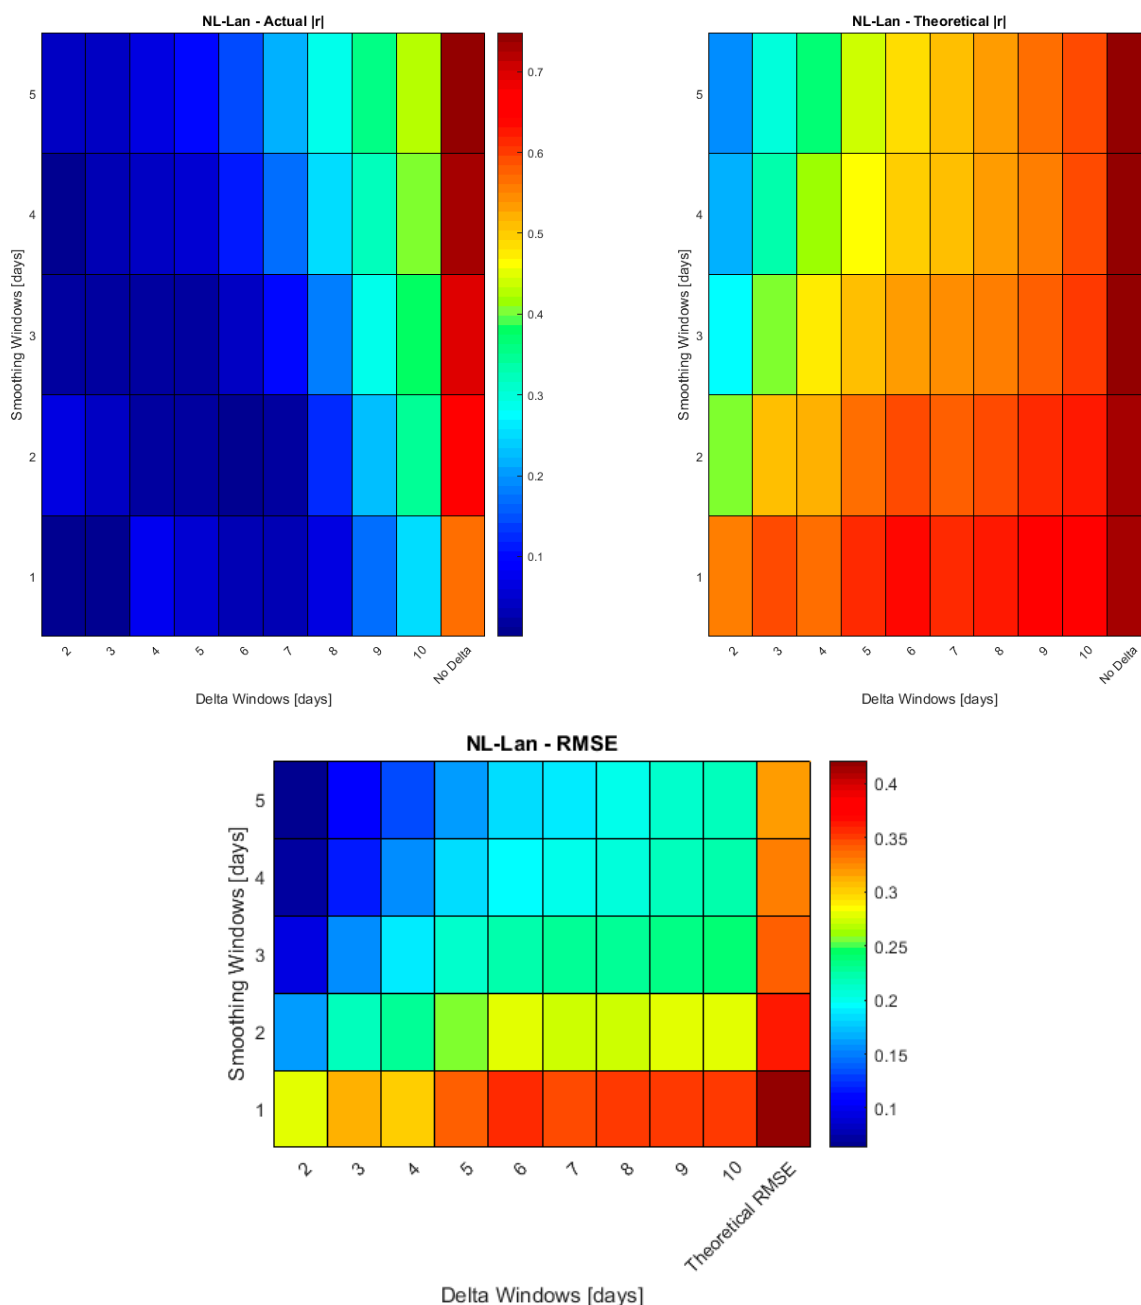

**Figure S5.** Actual versus theoretical  $|r|$  and RMSE performance of the  $\Delta LUE_{Canopy}$  retrievals at NL-Lan at different levels of smoothing and values of  $\Delta$ .  $N = 150$ .

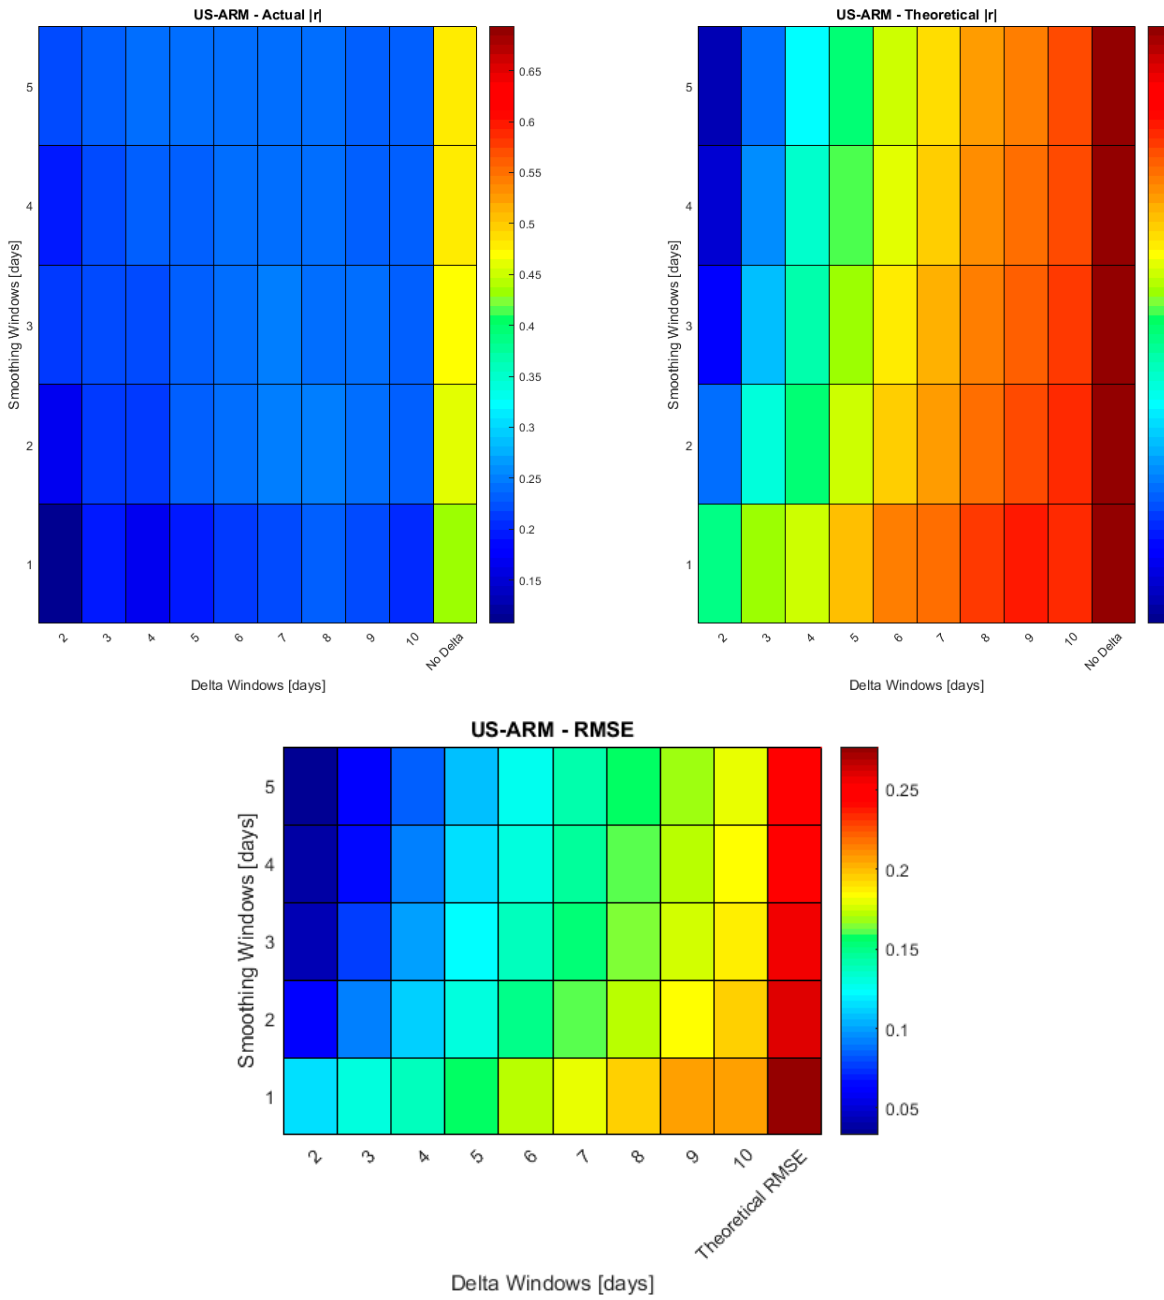

**Figure S6.** Actual versus theoretical  $|r|$  and RMSE performance of the  $\Delta LUE_{Canopy}$  retrievals at US-ARM at different levels of smoothing and values of  $\Delta$ .  $N = 135$ .

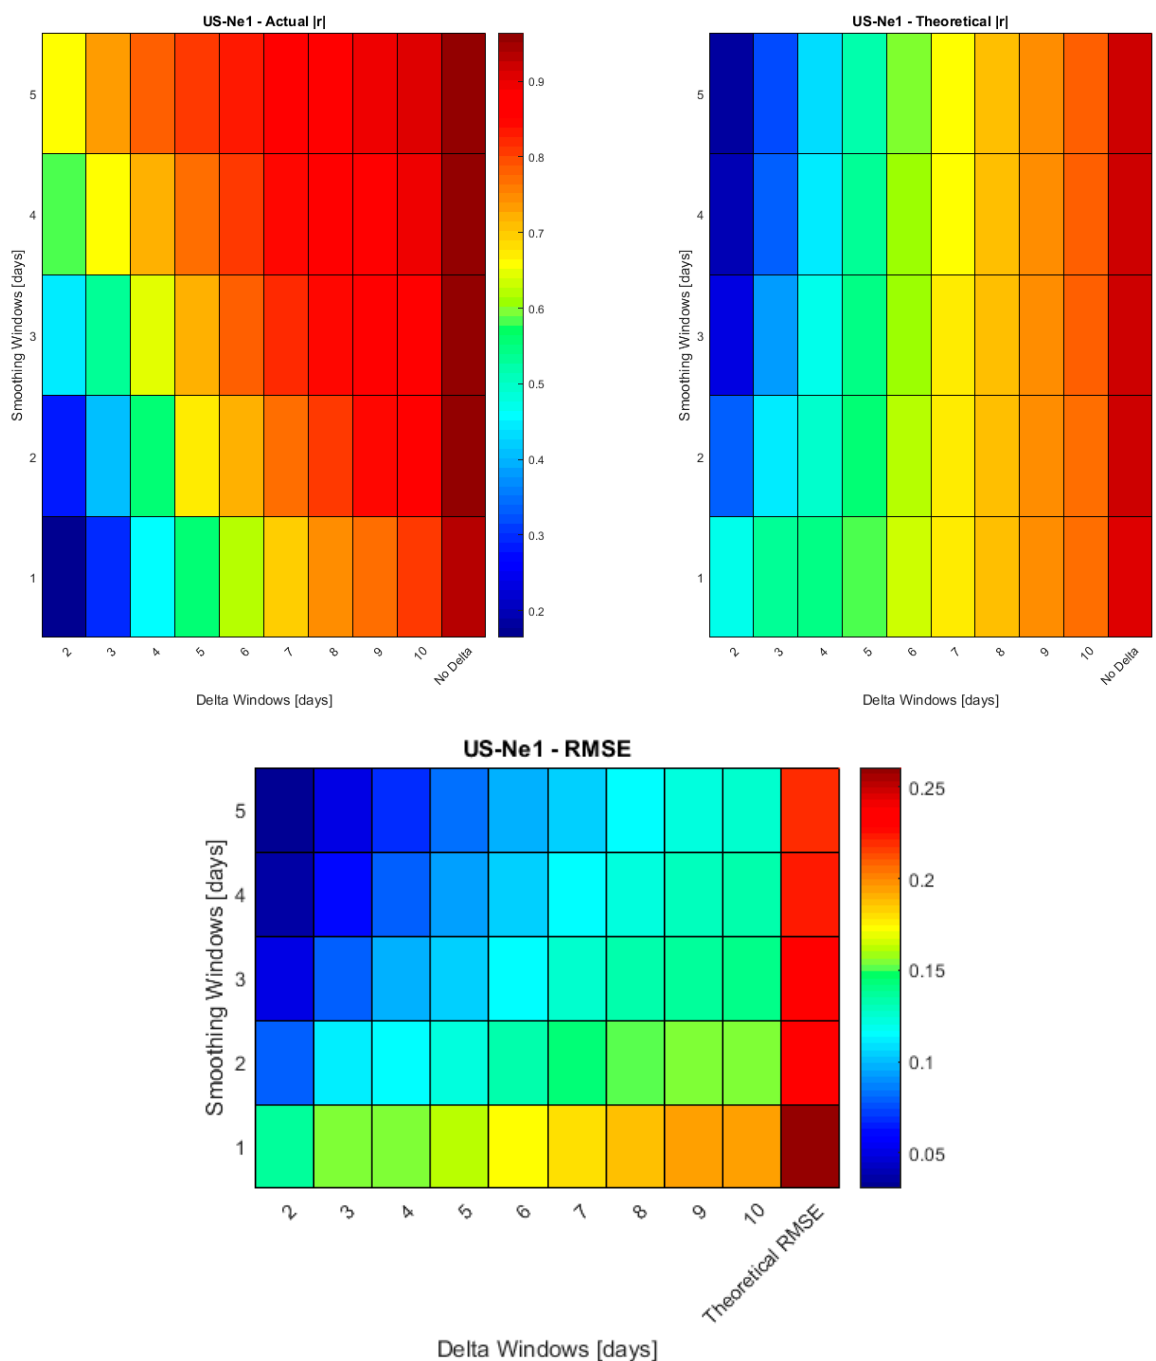

**Figure S7.** Actual versus theoretical  $|r|$  and RMSE performance of the  $\Delta LUE_{Canopy}$  retrievals at US-Ne1 at different levels of smoothing and values of  $\Delta$ .  $N = 1427$ .

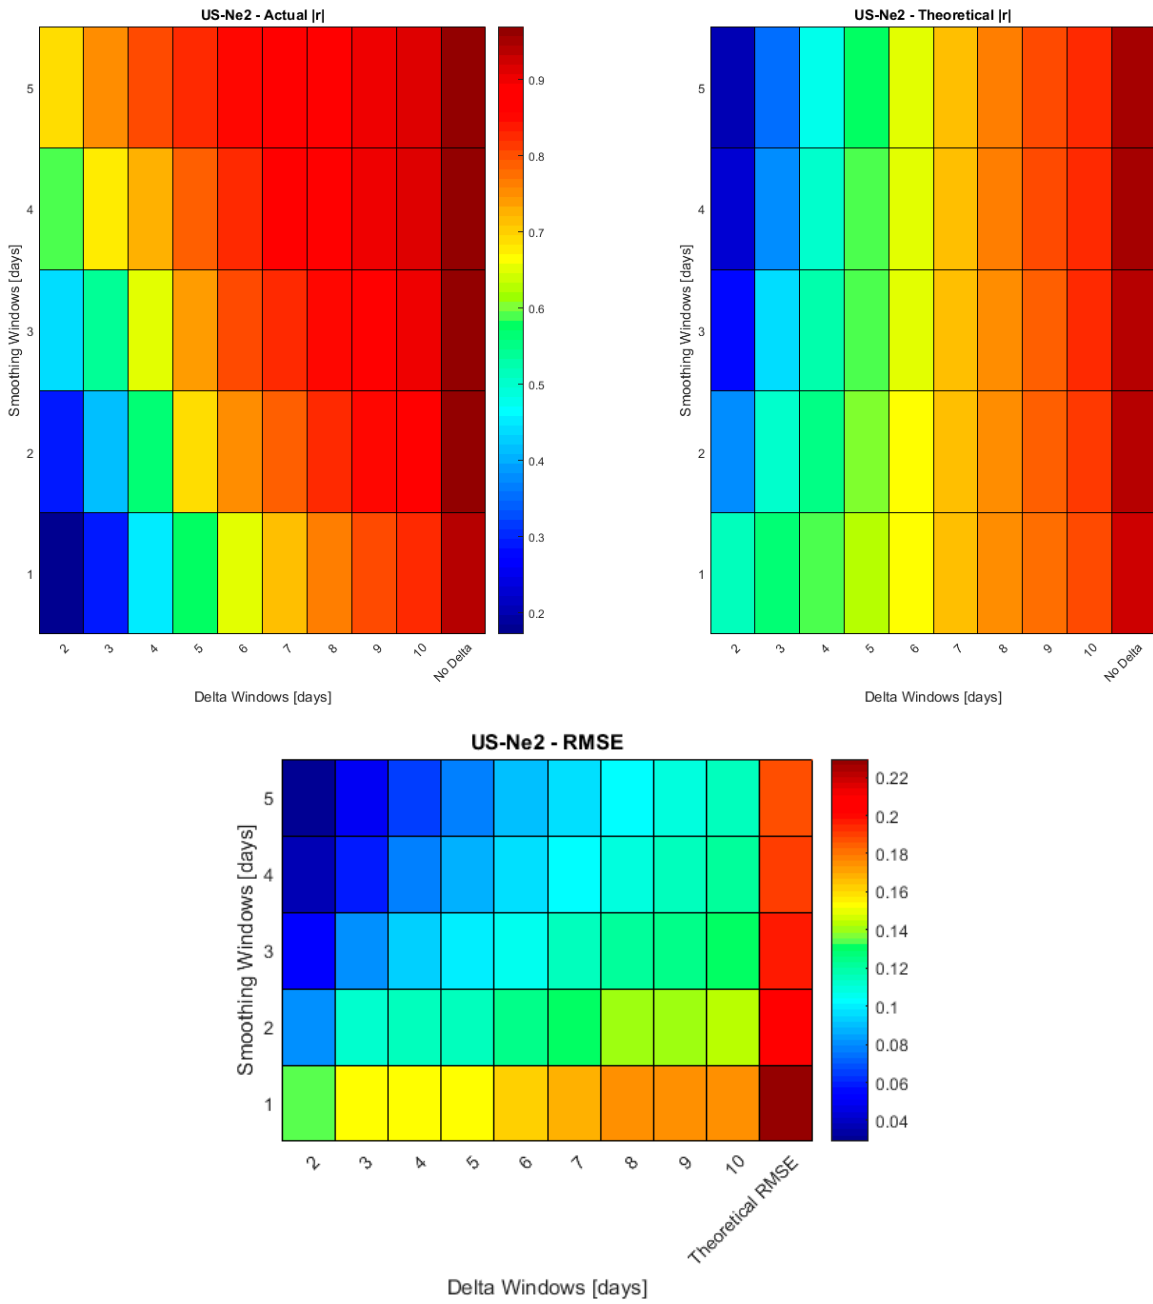

**Figure S8.** Actual versus theoretical  $|r|$  and RMSE performance of the  $\Delta LUE_{\text{Canopy}}$  retrievals at US-Ne2 at different levels of smoothing and values of  $\Delta$ .  $N = 799$ .



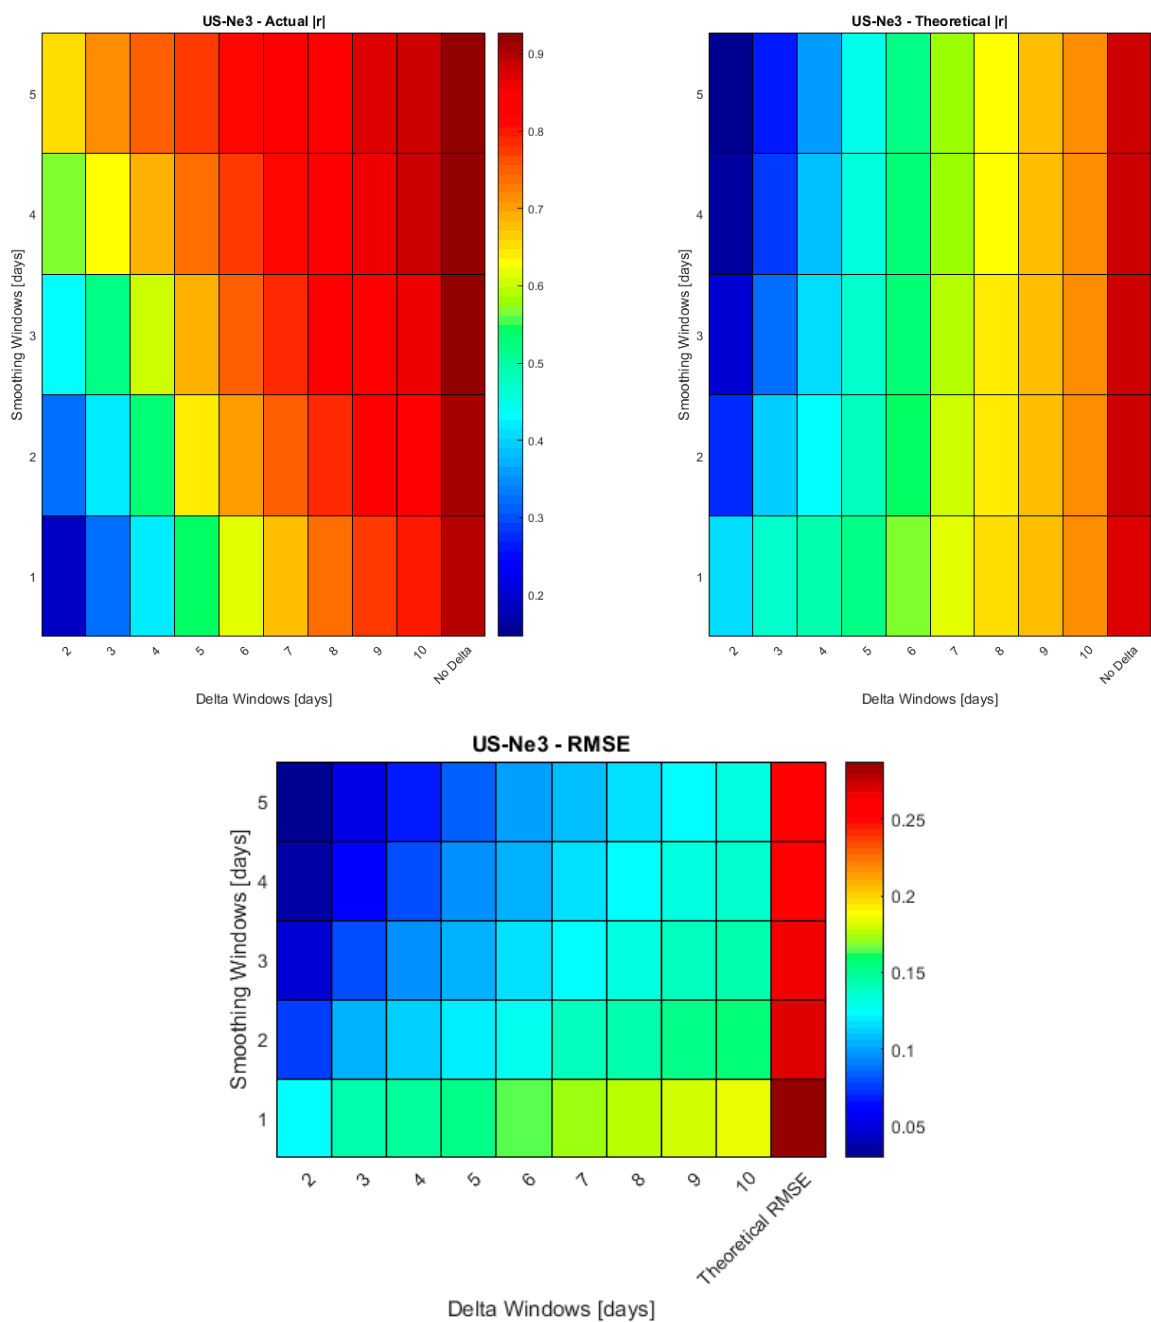

**Figure S9.** Actual versus theoretical  $|r|$  and RMSE performance of the  $\Delta LUE_{Canopy}$  retrievals at US-Ne3 at different levels of smoothing and values of  $\Delta$ .  $N = 786$ .

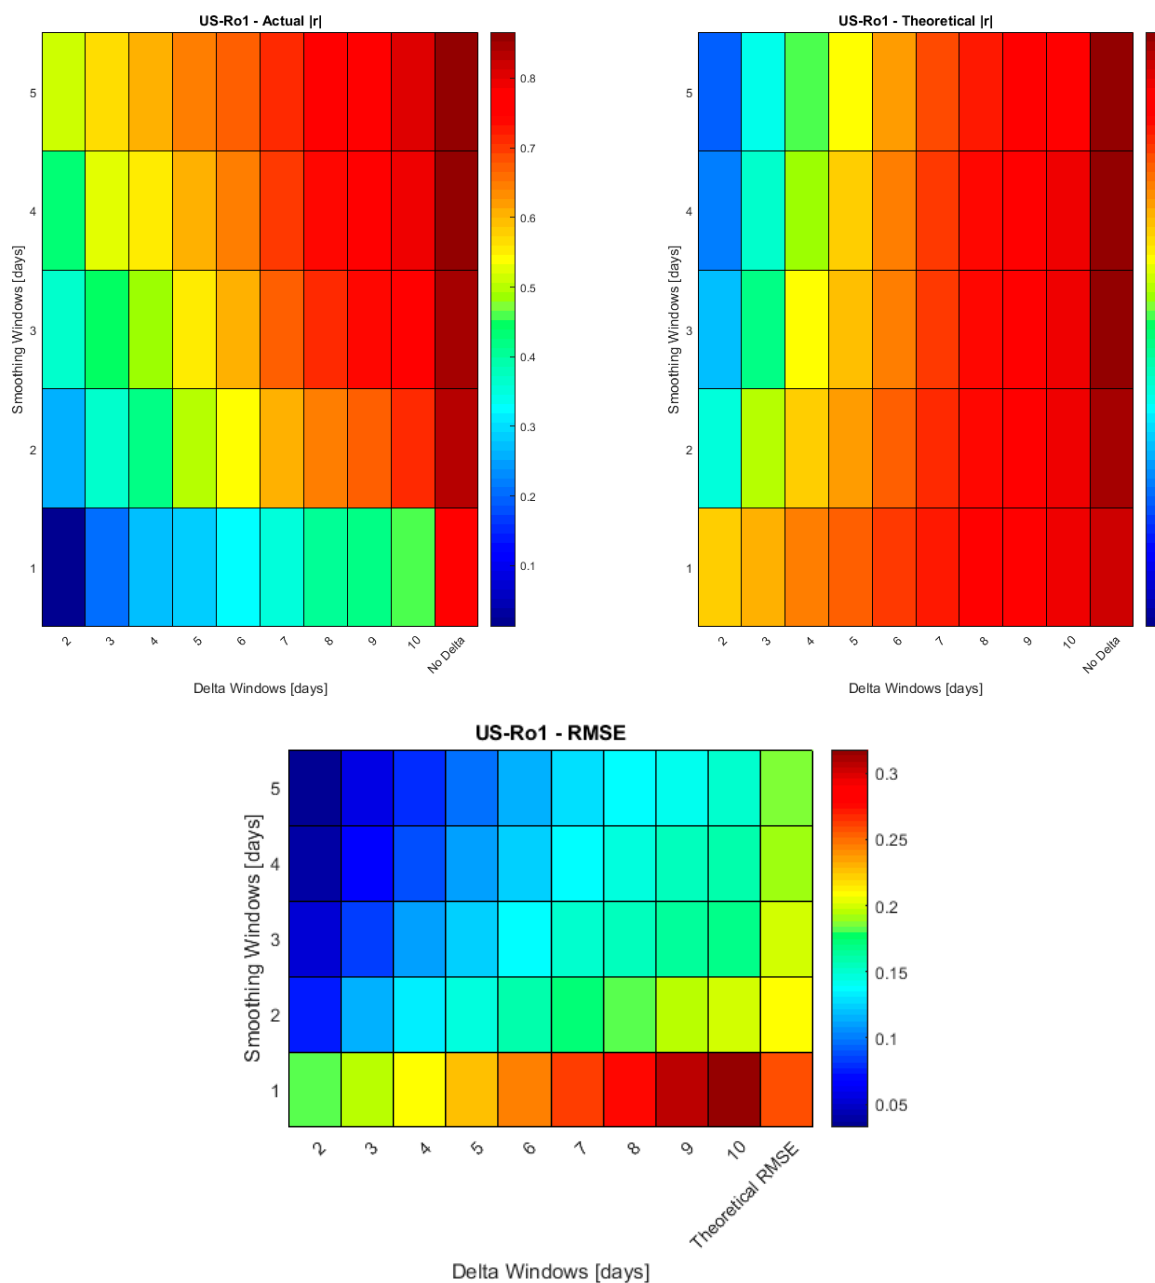

**Figure S10.** Actual versus theoretical |r| and RMSE performance of the  $\Delta LUE_{Canopy}$  retrievals at US-Ro1 at different levels of smoothing and values of  $\Delta$ . N = 263.

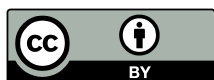

© 2019 by the authors; licensee MDPI, Basel, Switzerland. This article is an open access article distributed under the terms and conditions of the Creative Commons by Attribution (CC-BY) license (<http://creativecommons.org/licenses/by/4.0/>).
